# Supplementary material
Source: publisher figshare collection journal article supplement (https://acs.figshare.com/ndownloader/files/22137684)
Supplement: Supplementary file 1 [file 22137684]

## **Supporting Information**

### **Title:**

Household water storage management, hygiene practices and associated drinking water quality in rural India

### **Authors:**

Sarah L. McGuinness,<sup>1\*</sup> Joanne O'Toole,<sup>1</sup> S. Fiona Barker,<sup>1</sup> Andrew B. Forbes,<sup>1</sup> Thomas B. Boving,<sup>3</sup> Asha Giriyan,<sup>2</sup> Kavita Patil,<sup>2</sup> Fraddry D'Souza,<sup>2</sup> Ramkrishna Vhaval,<sup>2</sup> Allen C. Cheng,<sup>1</sup> Karin Leder<sup>1</sup>

<sup>1</sup>School of Public Health and Preventive Medicine, Monash University, Melbourne, Victoria, Australia

<sup>2</sup>The Energy and Resources Institute (TERI), Southern Regional Centre, Goa, India

<sup>3</sup>Department of Geosciences & Department of Civil and Environmental Engineering, University of Rhode Island, Kingston, Rhode Island, USA

\*Corresponding Author – email: [sarah.mcguinness@monash.edu](mailto:sarah.mcguinness@monash.edu), phone: +61 3 9903 0118; address: Monash University SPHPM, 553 St Kilda Road, Melbourne, Victoria 3004 Australia

**Pages:** 9

**Figures:** 3

**Tables:** 3

**Figure S1:** Schematic representation of study design and data collection. HH=household, T1-T5= time periods 1-5.

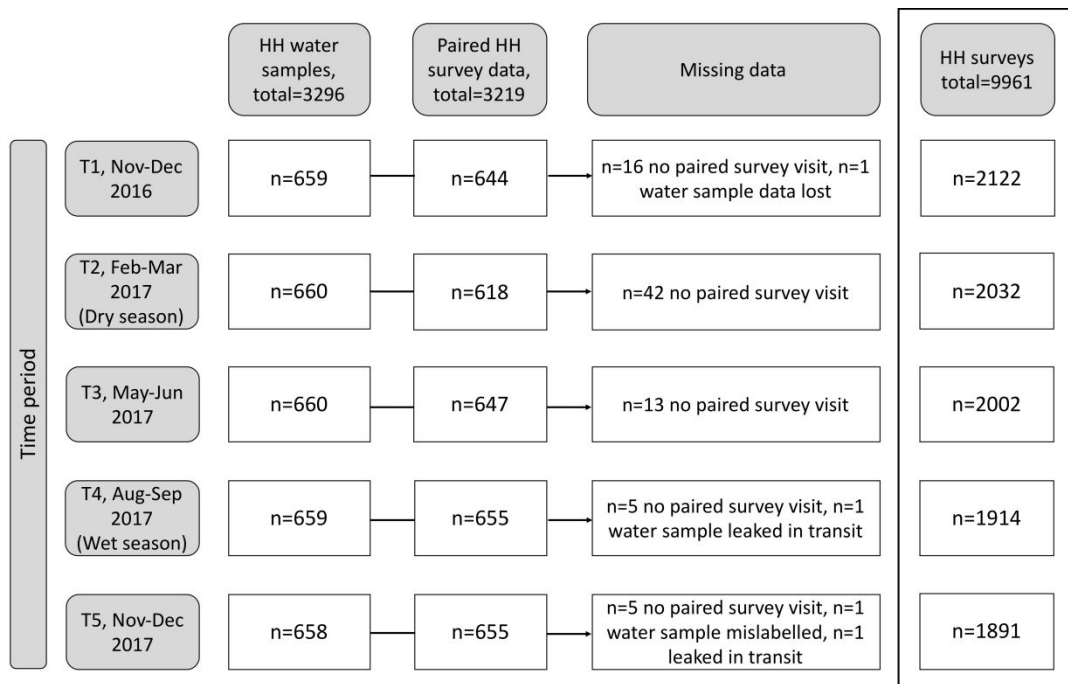

**Figure S2:** Microbial quality (*E. coli* colony-forming units/100mL by WHO risk category) of household drinking water samples by time period (T1-T5). Numbers within bars represent proportion (%) of samples in each risk category.

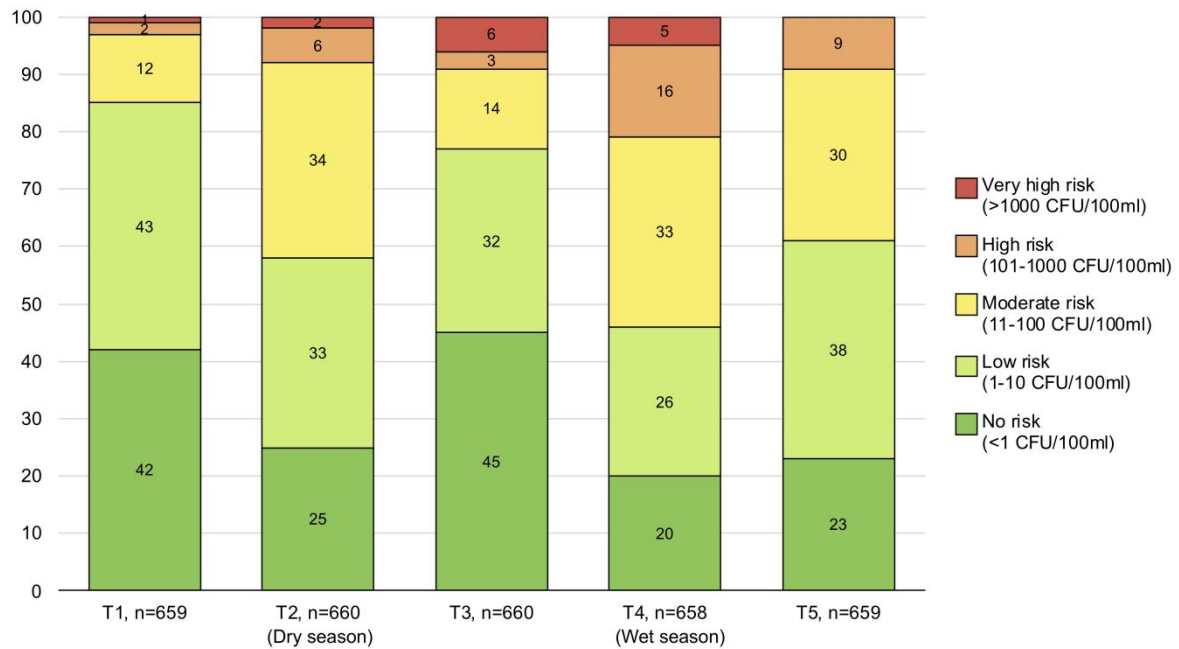

**Figure S3:** Microbial quality (*E. coli* colony-forming units/100mL by WHO risk category) of household drinking water samples by village. Numbers within bars represent proportion (%) of samples in each risk category.

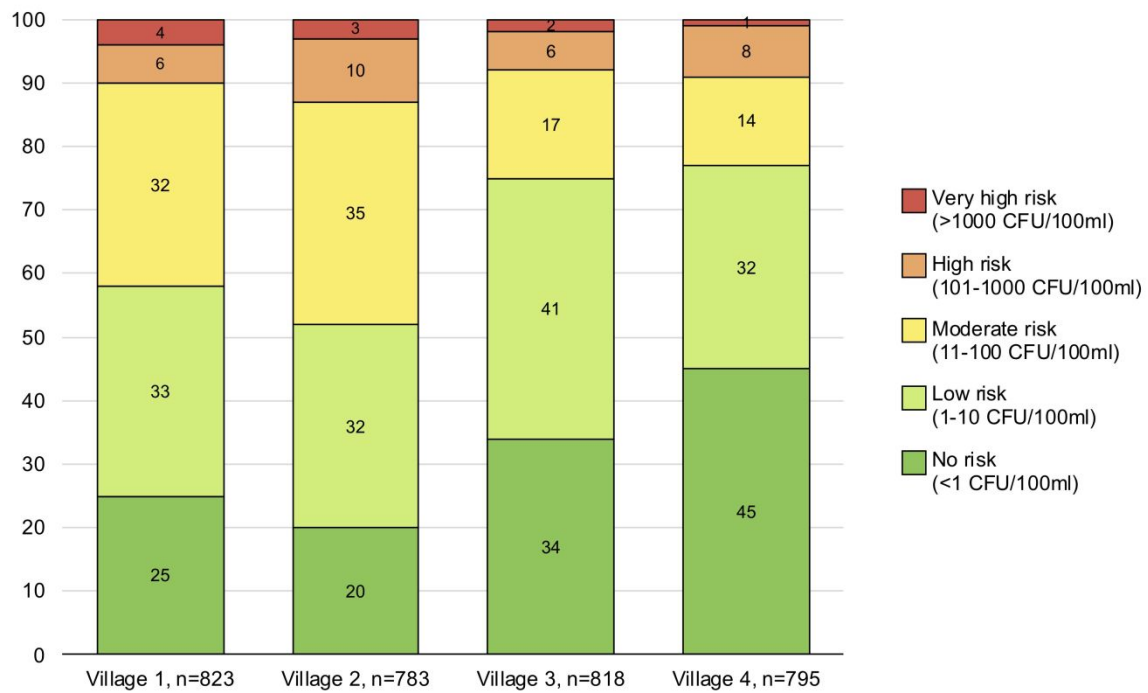

**Table 1:** Trends in household water sources, water storage and treatment, presence of soap at handwashing station and handwashing practices over time, n=9961 surveys

|                                                                                                    | Time period      |                  |                   |                  |                  | Total surveys           |
|----------------------------------------------------------------------------------------------------|------------------|------------------|-------------------|------------------|------------------|-------------------------|
| Item                                                                                               | T1               | T2               | T3                | T4               | T5               |                         |
| <b>Number of household surveys conducted, n</b>                                                    | <b>2122</b>      | <b>2032</b>      | <b>2002</b>       | <b>1914</b>      | <b>1891</b>      | <b>9961</b>             |
| <b>Demographics</b>                                                                                |                  |                  |                   |                  |                  |                         |
| Mud, dirt or clay flooring in household, n (%)                                                     | 725 (34)         | 695 (34)         | 683 (34)          | 651 (34)         | 642 (34)         | <b>3396 (34)</b>        |
| Use of clean fuel (LPG) for cooking, n (%)                                                         | 967 (46)         | 913 (45)         | 907 (45)          | 869 (45)         | 857 (45)         | <b>4513 (45)</b>        |
| Own refrigerator                                                                                   | 76 (4)           | 67 (3)           | 67 (3)            | 65 (3)           | 65 (3)           | <b>340 (3)</b>          |
| <b>Main reported source of household drinking water</b>                                            |                  |                  |                   |                  |                  |                         |
| River water, n (%)                                                                                 | 1,796 (85)       | 1,360 (67)       | 1,792 (90)        | 1,859 (97)       | 1,673 (88)       | <b>8480 (85)</b>        |
| Reverse osmosis (RO) water, n (%)                                                                  | 127 (6)          | 124 (6)          | 143 (7)           | 8 (0)            | 21 (1)           | <b>423 (4)</b>          |
| Project tank water, n (%)                                                                          | 6 (0)            | 224 (11)         | 63 (3)            | 10 (1)           | 9 (1)            | <b>312 (3)</b>          |
| Bore water, n (%)                                                                                  | 192 (9)          | 310 (15)         | 3 (0)             | 2 (0)            | 174 (9)          | <b>681 (7)</b>          |
| Other source, n (%)                                                                                | 1 (0)            | 14 (1)           | 1 (0)             | 34 (2)           | 14 (1)           | <b>64 (1)</b>           |
| <b>Reported use of secondary drinking water sources</b>                                            | 640 (30)         | 862 (42)         | 798 (40)          | 822 (43)         | 962 (51)         | <b>4084 (41)</b>        |
| <b>Household drinking water storage and treatment</b>                                              |                  |                  |                   |                  |                  |                         |
| Storage of drinking water, n (%)                                                                   | 1981 (93)        | 1964 (97)        | 1621 (81)         | 1340 (70)        | 1365 (72)        | <b>8271 (83)</b>        |
| <i>More than one stored water container</i>                                                        | <i>986 (50)</i>  | <i>891 (45)</i>  | <i>1182 (73)</i>  | <i>899 (67)</i>  | <i>612 (45)</i>  | <b><i>4570 (55)</i></b> |
| <i>Report treating stored water (any method), n (%)<sup>a</sup></i>                                | <i>1606 (81)</i> | <i>1440 (73)</i> | <i>1434 (88)</i>  | <i>1190 (89)</i> | <i>973 (71)</i>  | <b><i>6643 (80)</i></b> |
| <i>Report treating stored water with method likely to improve water quality, n (%)<sup>b</sup></i> | <i>348 (18)</i>  | <i>272 (14)</i>  | <i>302 (19)</i>   | <i>117 (9)</i>   | <i>66 (5)</i>    | <b><i>1105 (13)</i></b> |
| <i>Method of access = dip cup or ladle, n (%)</i>                                                  | <i>1260 (64)</i> | <i>1291 (66)</i> | <i>1367 (84)</i>  | <i>1193 (89)</i> | <i>1032 (76)</i> | <b><i>6143 (74)</i></b> |
| <i>Water storage vessel covered, n (%)<sup>c</sup></i>                                             | <i>1825 (98)</i> | <i>1764 (97)</i> | <i>1513 (100)</i> | <i>1279 (99)</i> | <i>1356 (99)</i> | <b><i>7737 (99)</i></b> |
| <b>Reported sanitation practices: main location of defecation</b>                                  |                  |                  |                   |                  |                  |                         |
| Open defecation                                                                                    | 1013 (48)        | 909 (45)         | 723 (36)          | 757 (39)         | 761 (40)         | <b>4163 (42)</b>        |
| Home latrine                                                                                       | 853 (40)         | 922 (45)         | 1014 (51)         | 875 (46)         | 882 (47)         | <b>4546 (46)</b>        |
| Shared latrine                                                                                     | 256 (12)         | 200 (10)         | 265 (13)          | 279 (15)         | 248 (13)         | <b>1248 (12)</b>        |
| <b>Handwashing station</b>                                                                         |                  |                  |                   |                  |                  |                         |
| Handwashing station observed                                                                       | 1850 (87)        | 1723 (85)        | 1587 (79)         | 1507 (79)        | 1474 (78)        | <b>8141 (82)</b>        |
| <i>Soap or detergent observed at station</i>                                                       | <i>1281 (69)</i> | <i>1327 (77)</i> | <i>1509 (95)</i>  | <i>1313 (87)</i> | <i>1262 (86)</i> | <b><i>6692 (82)</i></b> |
| <b>Reported “usual” handwashing practices</b>                                                      |                  |                  |                   |                  |                  |                         |

|                         |           |           |           |           |           |                  |
|-------------------------|-----------|-----------|-----------|-----------|-----------|------------------|
| After using a toilet    | 925 (44)  | 904 (44)  | 1173 (59) | 1010 (53) | 1036 (55) | <b>5048 (51)</b> |
| Before eating           | 2036 (96) | 1940 (95) | 1882 (94) | 1865 (97) | 1755 (93) | <b>9478 (95)</b> |
| Before food preparation | 1042 (49) | 1258 (62) | 1338 (67) | 1432 (75) | 887 (47)  | <b>5957 (60)</b> |

Figures shown in italics represent a subset of households; percentages are calculated from the relevant subset (i.e. amongst households reporting water storage or amongst households where handwashing station was observed). <sup>a</sup>Included methods of water treatment include filtering water through cloth, letting water stand and settle, adding flocculant, chlorine or potassium, using an electronic or ceramic water filter or boiling. <sup>b</sup>Encompasses chlorination, boiling, and/or use of an electronic or ceramic filter. <sup>c</sup>Household declined to answer at 420 visits (5%)

**Table S2:** Frequency of reported and observed household characteristics by village

| <b>Exposure</b>                                                                              | <b>Village 1 (n=823), n (%)</b> | <b>Village 2 (n=783), n (%)</b> | <b>Village 3 (n=818), n (%)</b> | <b>Village 4 (n=795), n (%)</b> |
|----------------------------------------------------------------------------------------------|---------------------------------|---------------------------------|---------------------------------|---------------------------------|
| <b><i>Water contaminated with E. coli</i></b>                                                | 617 (75)                        | 627 (80)                        | 542 (66)                        | 437 (55)                        |
| <b><i>Household demographics</i></b>                                                         |                                 |                                 |                                 |                                 |
| Use of clean fuel (LPG) for cooking                                                          | 395 (49)                        | 588 (75)                        | 274 (34)                        | 285 (36)                        |
| Mud or dirt flooring in home                                                                 | 459 (57)                        | 118 (15)                        | 231 (29)                        | 194 (25)                        |
| <b><i>Reported behaviors &amp; water choices at survey visit</i></b>                         |                                 |                                 |                                 |                                 |
| Open defecation                                                                              | 338 (41)                        | 42 (5)                          | 578 (71)                        | 371 (47)                        |
| Handwashing after toileting                                                                  | 546 (66)                        | 2 (<1)                          | 813 (100)                       | 745 (94)                        |
| Handwashing before eating                                                                    | 821 (100)                       | 781 (100)                       | 815 (100)                       | 783 (99)                        |
| Storage of drinking water in the home                                                        | 807 (98)                        | 480 (61)                        | 792 (97)                        | 719 (90)                        |
| <i>Treatment of stored drinking water</i>                                                    | 792 (98)                        | 302 (63)                        | 642 (81)                        | 392 (55)                        |
| <i>Treatment of stored drinking water using method likely to make water safe</i>             | 4 (1)                           | 45 (6)                          | 76 (9)                          | 125 (16)                        |
| <i>Water storage vessel covered*</i>                                                         | 807 (100)                       | 360 (100)                       | 741 (100)                       | 617 (88)                        |
| <i>Access stored drinking water using cup/dipper</i>                                         | 786 (97)                        | 80 (17)                         | 601 (76)                        | 573 (80)                        |
| <i>Access stored drinking water using tap/spigot</i>                                         | 21 (3)                          | 0 (0)                           | 81 (10)                         | 24 (3)                          |
| <i>Access stored drinking water by pouring</i>                                               | 0 (0)                           | 391 (92)                        | 110 (14)                        | 122 (17)                        |
| Main source of drinking water from river                                                     | 452 (55)                        | 782 (100)                       | 702 (86)                        | 753 (95)                        |
| Main source of drinking water from reverse osmosis facility                                  | 33 (4)                          | 0 (0)                           | 77 (9)                          | 18 (2)                          |
| Main source of drinking water from project tanks                                             | 22 (3)                          | 0 (0)                           | 30 (4)                          | 24 (3)                          |
| Main source of drinking water from bore                                                      | 313 (38)                        | 0 (0)                           | 5 (1)                           | 0 (0)                           |
| <b><i>Observations at survey visit</i></b>                                                   |                                 |                                 |                                 |                                 |
| Observation of handwashing station permitted                                                 | 823 (100)                       | 169 (22)                        | 750 (92)                        | 709 (89)                        |
| <i>Presence of soap or detergent at handwashing station</i>                                  | 600 (73)                        | 127 (75)                        | 728 (97)                        | 451 (64)                        |
| <b><i>Reported behaviors relating to sampled household water at water sampling visit</i></b> |                                 |                                 |                                 |                                 |
| Treatment of stored water                                                                    | 563 (69)                        | 685 (88)                        | 62 (8)                          | 284 (36)                        |
| Sourced from reverse osmosis facility*                                                       | 127 (18)                        | 398 (51)                        | 237 (29)                        | 393 (50)                        |

|                                                       |          |           |           |          |
|-------------------------------------------------------|----------|-----------|-----------|----------|
| <b>Observations at water sampling visit</b>           |          |           |           |          |
| Observation of water collection permitted             | 727 (88) | 783 (100) | 817 (100) | 785 (99) |
| <i>Water storage vessel covered</i>                   | 599 (82) | 774 (99)  | 817 (100) | 676 (86) |
| <i>Access stored drinking water using cup/dipper*</i> | 302 (77) | 474 (79)  | 607 (86)  | 601 (83) |
| <i>Access stored drinking water using tap/spigot*</i> | 52 (13)  | 66 (11)   | 94 (13)   | 57 (8)   |
| <i>Access stored drinking water by pouring*</i>       | 36 (9)   | 61 (10)   | 7 (1)     | 68 (9)   |
| <i>Water storage container located on floor*</i>      | 156 (22) | 696 (89)  | 290 (36)  | 514 (67) |
| <i>Water storage container located on bench*</i>      | 257 (36) | 81 (10)   | 509 (63)  | 179 (23) |
| <i>Water storage container located outside*</i>       | 309 (43) | 5 (1)     | 16 (2)    | 78 (10)  |

\*Exposures with missing responses for some visits: Reported water storage vessel kept covered (n=186); Reported sourced from reverse osmosis facility (n=110); Observed stored water access method (n=795); Observed water storage container location (n=104)

Figures shown in italics represent a subset of households; percentages are calculated from the relevant subset (i.e. amongst households reporting water storage or amongst households where handwashing station was observed)

**Table S3** Relationship between reported water treatment behaviors and household stored water contamination

| Exposure                                                                 | Visits with exposure | Visits where water contaminated with <i>E. coli</i> |                         |                       | Adjusted risk ratio (95% CI) <sup>a</sup> | P value |
|--------------------------------------------------------------------------|----------------------|-----------------------------------------------------|-------------------------|-----------------------|-------------------------------------------|---------|
|                                                                          |                      | With exposure, n (%)                                | Without exposure, n (%) | Unadjusted risk ratio |                                           |         |
| <i>Reported behaviors &amp; water choices at survey visit</i>            |                      |                                                     |                         |                       |                                           |         |
| <i>Treatment with method likely to improve water quality<sup>c</sup></i> | 9%                   | 140 (56)                                            | 1785 (70)               | 0.80                  | 1.02 (0.94 – 1.10)                        | 0.67    |
| <i>Treat stored water by boiling*</i>                                    | <1%                  | 8 (62)                                              | 5 (38)                  | 0.89                  | 1.07 (0.81 – 1.42)                        | 0.63    |
| <i>Treat stored water by electronic filter*</i>                          | 5%                   | 72 (48)                                             | 77 (52)                 | 0.69                  | 1.03 (0.94 – 1.14)                        | 0.54    |
| <i>Treat stored water by candle filter*</i>                              | 3%                   | 60 (67)                                             | 29 (33)                 | 0.98                  | 1.05 (0.93 – 1.19)                        | 0.43    |
| <i>Treat stored water by adding chlorine/bleach*</i>                     | <1%                  | 1 (50)                                              | 1 (50)                  | 0.72                  | 0.96 (0.37 – 2.44)                        | 0.92    |

\*Results of these analyses should be interpreted with caution, as low numbers of exposed participants precludes meaningful analysis.
